recruited in the pancreas of streptozotocin-induced diabetic animals, but neither sign of endocrine transdifferentiation nor improvement in blood glucose metabolism have been shown (7). Moreover, this claimed mechanism would clearly interest only those forms of diabetes due to primitive  $\beta$ -cell failure, while only 40% of the study patients had type 1 diabetes.

GIAN PAOLO FADINI, MD  
ANGELO AVOGARO, MD, PHD

From the Department of Clinical and Experimental Medicine, Metabolic Division, University of Padova Medical School, Padova, Italy.

Address correspondence to Gian Paolo Fadini, MD, Dipartimento di Medicina Clinica e Sperimentale, Divisione di Malattie del Metabolismo, Policlinico Universitario, Via Giustiniani, 2, 35100 Padova, Italy. E-mail: gianpaolofadini@hotmail.com.

© 2006 by the American Diabetes Association.

References

1. Huang P, Li S, Han M, Xiao Z, Yang R, Han ZC: Autologous transplantation of granulocyte colony-stimulating factor-mobilized peripheral blood mononuclear cells improves critical limb ischemia in diabetes. *Diabetes Care* 28:2155–2160, 2005
2. Duh E, Aiello LP: Vascular endothelial growth factor and diabetes: the agonist versus antagonist paradox. *Diabetes* 48:1899–1906, 1999
3. Fadini GP, Miorin M, Facco M, Bonamico S, Baesso I, Grego F, Menegolo M, de Kreutzenberg SV, Tiengo A, Agostini C, Avogaro A: Circulating endothelial progenitor cells are reduced in peripheral vascular complications of type 2 diabetes mellitus. *J Am Coll Cardiol* 45:1449–1457, 2005
4. Lee IG, Chae SL, Kim JC: Involvement of circulating endothelial progenitor cells and vasculogenic factors in the pathogenesis of diabetic retinopathy. *Eye* 2005 [Epub ahead of print]
5. Ishikawa M, Asahara T: Endothelial progenitor cell culture for vascular regeneration. *Stem Cells Dev* 13:344–349, 2004
6. Suzuki A, Nakauchi H, Taniguchi H: Prospective isolation of multipotent pancreatic progenitors using flow-cytometric cell sorting. *Diabetes* 53:2143–2152, 2004
7. Mathews V, Hanson PT, Ford E, Fujita J, Polonsky KS, Graubert TA: Recruitment of bone marrow-derived endothelial cells to sites of pancreatic  $\beta$ -cell injury. *Diabetes* 53:91–98, 2004

## Autologous Transplantation of Granulocyte Colony-Stimulating Factor-Mobilized Peripheral Blood Mononuclear Cells Improves Critical Limb Ischemia in Diabetes

Response to Fadini and Avogaro

Recently, our pilot study provided evidence that autologous transplantation of granulocyte colony-stimulating factor-mobilized peripheral blood mononuclear cells (PBMNCs) may represent a simple, safe, effective, and novel therapeutic approach for diabetic critical limb ischemia (CLI) (1). In our study, we chose diabetic patients with proven CLI, but without hypercoagulable states and/or severe coronary, cerebral, and renal vascular disease. As pointed out by Fadini and Avogaro (2), poor blood vessel growth in ischemic hearts and limbs and increased angiogenesis in retinal complications are paradoxical vascular complications in diabetic patients. This so-called “diabetic paradox” has been attributed to the differential regulation of angiogenic factors in the retina versus the systemic circulation (3). Thus, we may have to choose a compromised approach to balance these two divergent complications. For patients with mild or absent retinal complications but very severe limb ischemia that manifests ulceration, gangrene, or nonhealing wounds, we may give priority to improving CLI. We agree that we must be cognizant of a treatment approach that focuses on improving CLI, as well as remain aware of the potential risk for worsening diabetic retinopathy. In addition, we must monitor undesirable retinal vascular changes.

Dysfunctional endothelial progenitor cells (EPCs) from diabetes (4) may attenuate the effectiveness of our approach for CLI. However, we have observed that mobilized PBMNCs yielded more EPCs from diabetic individuals than nonmobilized ones, partially compensating for the fewer number of EPCs in diabetes. In addition, our results revealed that the mechanism in vivo is not limited to EPCs. Proangiogenic factors secreted by mononuclear

cells played an equally important role in vivo (S. Li, B.Z., Z.C.H., unpublished data). Clinically, allogenic transplantation of normal mobilized PBMNCs may be more effective, but such transplanted cells may encounter rejection. Therefore, autologous transplantation of mobilized PBMNCs is still a good, albeit compromised and imperfect, approach.

As for decreased plasma glucose, we proposed that mobilization resulted in more circulating EPCs that could be recruited to the pancreas and that EPC-mediated neovascularization of the pancreas could in principle facilitate the recovery of non-terminally injured cells (5). The precise mechanism of decreased plasma glucose after mobilization awaits further investigation, for which a much higher number of patients will need to be involved.

BIN ZHOU, PHD<sup>1</sup>  
PINGPING HUANG, MD<sup>1,2</sup>  
ZHONG CHAO HAN, PHD, MD<sup>1,2</sup>

From the <sup>1</sup>State Key Laboratory of Experimental Hematology, National Research Center for Stem Cell Engineering and Technology, Institute of Hematology, Chinese Academy of Medical Sciences and Peking Union Medical College, Tianjin, China; and the <sup>2</sup>National Engineering Research Center of Cell Products, AmCellGene, Teda, Tianjin, China.

Address correspondence to Zhong Chao Han, Institute of Hematology, Chinese Academy of Medical Sciences & Peking Union Medical College, 288 Nanjing Rd., Tianjin 300020, China. E-mail: tihzchan@public.tpt.tj.cn.

© 2006 by the American Diabetes Association.

**Acknowledgments**— This work was supported by grants from the Ministry of Science & Technology of China 863 project (2002AA223354) and 973 project (001CB5101).

References

1. Huang P, Li S, Han M, Xiao Z, Yang R, Han ZC: Autologous transplantation of granulocyte colony-stimulating factor-mobilized peripheral blood mononuclear cells improves critical limb ischemia in diabetes. *Diabetes Care* 28:2155–2160, 2005
2. Fadini GP, Avogaro A: Autologous transplantation of granulocyte colony-stimulating factor-mobilized peripheral blood mononuclear cells improves critical limb ischemia in diabetes (Letter). *Diabetes Care* 29:478–479, 2006
3. Duh E, Aiello LP: Vascular endothelial growth factor and diabetes: the agonist versus antagonist paradox. *Diabetes* 48:1899–1906, 1999
4. Loomans CJ, de Koning EJ, Staal FJ,

Rookmaaker MB, Verseyden C, de Boer HC, Verhaar MC, Braam B, Rabelink TJ, Zonneveld AJ: Endothelial progenitor cell dysfunction: a novel concept in the pathogenesis of vascular complications of type 1 diabetes. *Diabetes* 53:195–199, 2004

- Mathews V, Hanson PT, Ford E, Fujita J, Polonsky KS, Graubert TA: Recruitment of bone marrow-derived endothelial cells to sites of pancreatic  $\beta$ -cell injury. *Diabetes* 53:91–98, 2004

## Cost-Effectiveness of Self-Monitoring of Blood Glucose in Type 2 Diabetic Patients Not Receiving Insulin

Response to Davidson

In his counterpoint article, Davidson (1) argues that self-monitoring of blood glucose (SMBG) in type 2 diabetic subjects not using insulin is a waste of money. However, as the discussions accompanying and following publication of a new meta-analysis by Welschen et al. (2) demonstrate, the evidence is far from conclusive either for or against use of SMBG in this patient group.

As pointed out by Ipp et al. (3), many of the trials of SMBG conducted thus far have been underpowered to detect a significant impact and therefore individually cannot reliably conclude that SMBG does or does not influence HbA<sub>1c</sub> (A1C). In an attempt to bring some clarity to the current situation, Welschen et al. performed a meta-analysis based upon pooling of more recent randomized trials with the conclusion that SMBG affords a modest but significant 0.39% reduction in A1C. According to Davidson, even if this effect is clinically relevant, it is likely to be outweighed by the cost of providing SMBG. To accurately answer that claim, we undertook a cost-effectiveness analysis of SMBG using a Markov state model of diabetes to assess the clinical impact and related cost when SMBG is provided to non-insulin-requiring patients within the German health care system. Assuming a modest improvement in A1C of 0.39%, the result was a slight increase in life expectancy (0.083 years) and reduced cost of complications (70% attributable to microvascular events). This finding is in line with the results of the U.K. Prospective

Diabetes Study, in which a 1% reduction in A1C corresponded to a reduction in complications (4). In our analysis, the cost per life-year gained was ~€31,000 and therefore, from a health insurance perspective, acceptable. Over a 10-year period and taking into consideration cost savings due to reduced complications, SMBG employed at a frequency of seven times/week would account for ~6% of the total direct costs covered by health insurance.

While current evidence is not perfect, it supports, on both clinical and economic grounds, the use of SMBG in type 2 diabetic subjects not using insulin. Therefore, it would be premature to consider withdrawal of this treatment option. As noted by Ipp et al. (3), now is the time for industry to fund large multicenter trials with sufficient power to confirm the findings obtained by pooling small randomized controlled trials.

KURT NEESER, DVM  
KATRINA M. ERNY-ALBRECHT, PHD  
CHRISTIAN WEBER, MD

From the Institute of Medical Informatics and Biostatistics, Basel, Switzerland.

K.N., K.M.E.-A., and C.W. have received grant/research support from Hoffman-La Roche.

Address correspondence to Kurt Neeser, Institute of Medical Informatics and Biostatistics (IMIB), Clarastrasse 15, Basel, Switzerland, CH-4058. E-mail: neeser@imib.ch.

© 2006 by the American Diabetes Association.

### References

- Davidson MB: Counterpoint: self-monitoring of blood glucose in type 2 diabetic patients not receiving insulin: a waste of money (Editorial). *Diabetes Care* 28:1531–1533, 2005
- Welschen LMC, Bloemendal E, Nijpels G, Dekker JM, Heine RJ, Stalman WAB, Bouter LM: Self-monitoring of blood glucose in patients with type 2 diabetes who are not using insulin: a systematic review. *Diabetes Care* 28:1510–1517, 2005
- Ipp E, Aquino RL, Christenson P: Point: self-monitoring of blood glucose in type 2 diabetic patients not receiving insulin: the sanguine approach (Editorial). *Diabetes Care* 28:1528–1530, 2005
- Stratton IM, Adler AI, Neil HA, Matthews DR, Manley SE, Cull CA, Hadden D, Turner RC, Holman RR: Association of glycaemia with macrovascular and microvascular complications of type 2 diabetes (UKPDS 35): prospective observational study. *BMJ* 321:405–412, 2000

## Cost-Effectiveness of Self-Monitoring of Blood Glucose in Type 2 Diabetic Patients Not Receiving Insulin

Response to Neeser et al.

Neeser et al. (1) challenge my argument that self-monitoring of blood glucose (SMBG) in type 2 diabetic patients not taking insulin is not beneficial for lowering glycemia and therefore is a waste of (a lot of) money (2).

In a meta-analysis of six randomized controlled trials, Welschen et al. (3) found a significant reduction of 0.39% in HbA<sub>1c</sub> (A1C) levels in type 2 diabetic patients not taking insulin who performed SMBG. Welschen et al. did point out that the reduction was only significant in two of the trials and that the conclusion that SMBG was beneficial “should be interpreted with caution, as the methodological quality of the trials . . . was limited in four of the six included studies.” A large number of nonrandomized studies were also negative (2,3). Be that as it may, Neeser et al. (1), using a Markov model on data from the German health care system, state that a 0.39% reduction of A1C levels resulted in a 30-day (0.083 years) increase of life expectancy and “reduced cost of complications (70% attributable to microvascular events).” The cost per life-year gained was ~€31,000 (or \$36,400) and “therefore, from a health insurance perspective, acceptable.” They conclude that it is “premature to consider withdrawal of this treatment option” and suggest that industry should fund large multicenter trials to determine whether SMBG is helpful in this situation.

Several points can be made in response. Although we are not given the costs of SMBG in non-insulin-requiring patients in the German health care system, I would emphasize that in the U.S., a conservative estimate of the cost of SMBG in these patients is nearly \$1.5 billion/year (2). This is a tremendous amount of money for an activity for which there is little (to be charitable) or no evidence for a beneficial outcome. If this were a drug, it certainly would not have received Food and Drug Administration approval. In a sense, therefore, SMBG in patients not taking insulin represents a very expensive “off-label” use. Of course, calls for larger
